# Supplementary material for: Fear of the CURE: A Beginner’s Guide to Overcoming Barriers in Creating a Course-Based Undergraduate Research Experience
Source: PubMed Central journal article supplement — J Microbiol Biol Educ. 2020 May 29;21(2):21.2.48. doi: 10.1128/jmbe.v21i2.2109 (PMC7243983; doi:10.1128/jmbe.v21i2.2109), 2020-05-29
Supplement: jmbe-21-48-s001.pdf [file jmbe-21-48-s001.pdf]

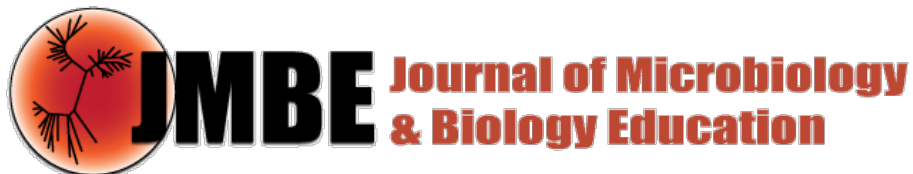

---

## Supplemental Materials

for

### **Fear of the CURE: A Beginner's Guide to Overcoming Barriers in Creating a Course-Based Undergraduate Research Experience**

Brinda Govindan<sup>1</sup>, Sarah Pickett<sup>1,2</sup>, and Blake Riggs<sup>1\*</sup>

<sup>1</sup>*Department of Biology, San Francisco State University, San Francisco, CA 94132;*

<sup>2</sup>*Center for Teaching and Learning, University of California, Berkeley, Berkeley, CA 94720*

#### **Table of Contents (Total pages 3)**

Appendix 1: Online resources for CURE approaches

\*Corresponding author. Mailing address: Department of  
Biology, 1600 Holloway Ave., San Francisco State University,  
San Francisco, CA 94132. Phone: 415-338-1499.  
E-mail: [riggs@sfsu.edu](mailto:riggs@sfsu.edu).  
Received: 18 February 2020, Accepted: 10 April 2020,  
Published: 29 May 2020

©2020 Author(s). Published by the American Society for Microbiology. This is an Open Access article distributed under the terms of the Creative Commons Attribution-Noncommercial-NoDerivatives 4.0 International license (<https://creativecommons.org/licenses/by-nc-nd/4.0/> and <https://creativecommons.org/licenses/by-nc-nd/4.0/legalcode>), which grants the public the nonexclusive right to copy, distribute, or display the published work.

## **Appendix 1: *Online resources for CURE approaches***

Online resources outlined below are some examples of CURE approaches and programs, provide access to descriptions and syllabi of CURE courses taught at other universities, and can connect you to a community of instructors who are currently teaching CUREs.

- ▶ CUREnet: <https://serc.carleton.edu/curennet/index.html>
  
- ▶ First Year Innovation and Research Experience (FIRE) at the University of Maryland: <https://www.fire.umd.edu>
  
- ▶ The Freshman Research Initiative (FRI) at University of Texas, Austin: <https://cns.utexas.edu/fri>
  
- ▶ The Place Based Learning Communities (PBLC) at Humboldt State University: <https://cnrs.humboldt.edu/learning-communities>
  
- ▶ The CURE Organization at University of California, Los Angeles: <http://cureat UCLA.weebly.com>
  
- ▶ The Prevalence of Antibiotic Resistance in the Environment (PARE) Project: <https://sites.tufts.edu/ctse/projects/pare/>
  
- ▶ SEA-PHAGES: <https://seaphages.org>
  
- ▶ The Great Sunflower Project: <https://www.greatsunflower.org>
  
- ▶ The Small World Initiative: <http://www.smallworldinitiative.org>
  
- ▶ Bean Beetles at Morehouse College and Emory University: <https://www.beanbeetles.org/>

► Islander Stream Team Citizen Science at Texas A&M University Corpus Christi/Center for Coastal Studies:

<https://tstcommunity.org/islander-stream-team-measure-water-quality-in-course-at-tamucc/>

► Genomics Education Partnership: <https://gpe.wustl.edu>
